# Supplementary material for: Development of a Prognostic Model for Preoperative Stage I-III Breast Cancer Using Machine Learning with Integrated Cone-Beam Breast Computed Tomography Data in the Context of 3P Medicine
Source: Research Square preprint supplement (doi:10.21203/rs.3.rs-5869303/v1), 2025-02-03
Supplement: Supplementary file 1 [file 16b1e56899b4050fb3dc6551.docx]

***Supplementary Figure***


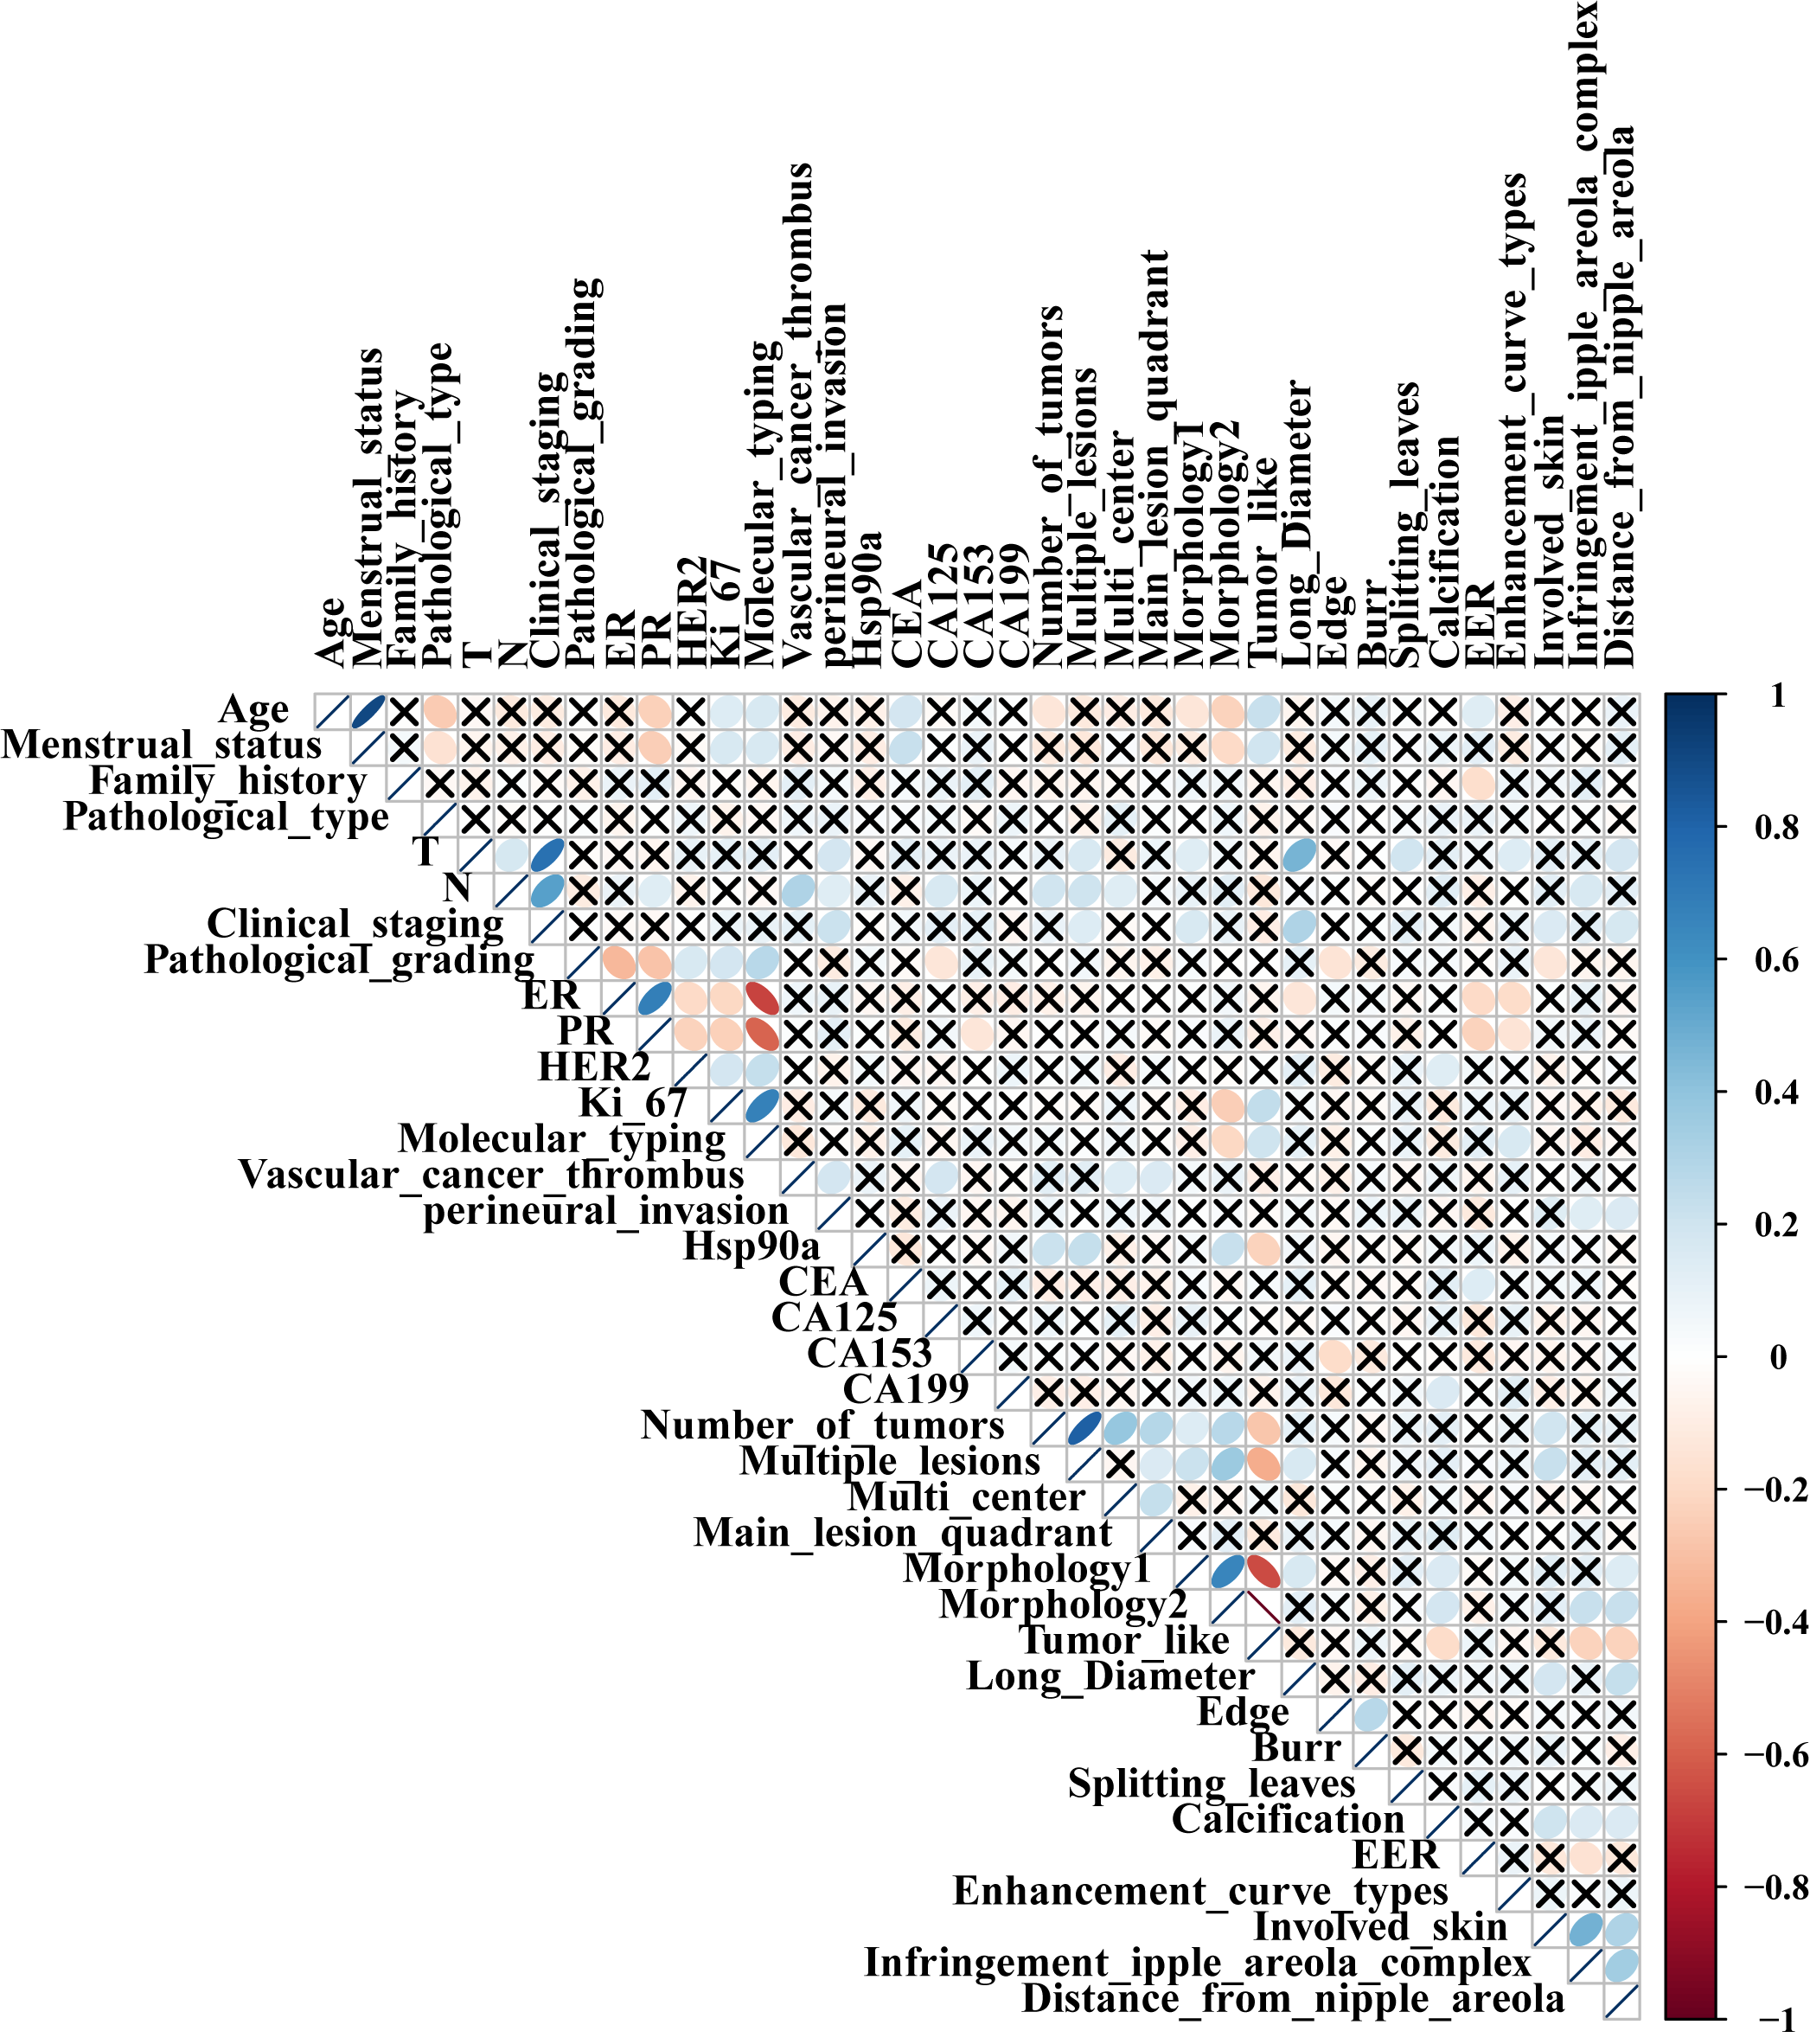


**Supplementary Figure 1** Correlation analysis of different clinical, haematological and imaging indicators. X represents the p>0.05 of the correlation test, and the color depth represents the size of the correlation.

**Abbreviation:** heat shock protein 90α, HSP90α; carcinoembryonic antigen, CEA; carbohydrate antigen 125, CA125; carbohydrate antigen 15-3, CA153; carbohydrate antigen 19-9, CA199.

***Supplementary Tables***

**Supplementary Table1 Univariate COX regression analysis of influencing results of** **breast cancer with OS as the outcome**

| **Characteristic** | **N** | **Event N** | **HR**1 | **95% CI**1 | **p-value** | **q-value**2 |
| --- | --- | --- | --- | --- | --- | --- |
| **T** | 213 | 16 |  |  | 0.60 | 0.98 |
| T1 |  |  | — | — |  |  |
| T2 |  |  | 1.54 | 0.56, 4.23 |  |  |
| T4 |  |  | 0.00 | 0.00, Inf |  |  |
| **N** | 213 | 16 |  |  | 0.96 | 0.98 |
| N0 |  |  | — | — |  |  |
| N1 |  |  | 0.86 | 0.27, 2.70 |  |  |
| N2 |  |  | 1.34 | 0.17, 10.3 |  |  |
| N3 |  |  | 0.00 | 0.00, Inf |  |  |
| **Clinical staging** | 213 | 16 |  |  | 0.59 | 0.98 |
| I |  |  | — | — |  |  |
| II |  |  | 1.77 | 0.56, 5.56 |  |  |
| III |  |  | 1.53 | 0.17, 13.7 |  |  |
| **Pathological grading** | 213 | 16 |  |  | 0.55 | 0.98 |
| I |  |  | — | — |  |  |
| II |  |  | 2,783,587 | 0.00, Inf |  |  |
| III |  |  | 4,432,468 | 0.00, Inf |  |  |
| **PR** | 213 | 16 |  |  | 0.83 | 0.98 |
| <1% |  |  | — | — |  |  |
| 1-10% |  |  | 1.29 | 0.24, 7.02 |  |  |
| >10% |  |  | 0.81 | 0.25, 2.59 |  |  |
| **Molecular typing** | 213 | 16 |  |  | 0.10 | 0.60 |
| Luminal A |  |  | — | — |  |  |
| Luminal B |  |  | 85,178,919 | 0.00, Inf |  |  |
| HER2 overexpression |  |  | 71,847,119 | 0.00, Inf |  |  |
| Triple negative |  |  | 183,728,123 | 0.00, Inf |  |  |
| **Vascular cancer thrombus** | 213 | 16 |  |  | 0.71 | 0.98 |
| No |  |  | — | — |  |  |
| Yes |  |  | 0.82 | 0.28, 2.36 |  |  |
| **perineural invasion** | 213 | 16 |  |  | 0.74 | 0.98 |
| No |  |  | — | — |  |  |
| Yes |  |  | 1.21 | 0.39, 3.77 |  |  |
| **Hsp90a** | 213 | 16 |  |  | 0.081 | 0.60 |
| <82 ng/mL |  |  | — | — |  |  |
| >82 ng/mL |  |  | 2.59 | 0.94, 7.15 |  |  |
| **CEA** | 213 | 16 |  |  | 0.18 | 0.82 |
| <5 ng/mL |  |  | — | — |  |  |
| >5 ng/mL |  |  | 2.04 | 0.74, 5.63 |  |  |
| **CA199** | 213 | 16 |  |  | 0.39 | 0.98 |
| <37 U/mL |  |  | — | — |  |  |
| >37 U/mL |  |  | 2.03 | 0.46, 8.94 |  |  |
| **Number of tumors** | 213 | 16 |  |  | 0.79 | 0.98 |
| 1 |  |  | — | — |  |  |
| 2 |  |  | 2.17 | 0.28, 16.5 |  |  |
| >2 |  |  | 0.94 | 0.12, 7.15 |  |  |
| **Multiple lesions** | 213 | 16 |  |  | 0.62 | 0.98 |
| No |  |  | — | — |  |  |
| Yes |  |  | 1.48 | 0.34, 6.50 |  |  |
| **Morphology** | 213 | 16 |  |  | 0.67 | 0.98 |
| solid |  |  | — | — |  |  |
| cystic solid |  |  | 1.82 | 0.51, 6.46 |  |  |
| non-mass |  |  | 0.89 | 0.12, 6.84 |  |  |
| **Long Diameter** | 213 | 16 |  |  | 0.61 | 0.98 |
| <2 CM |  |  | — | — |  |  |
| 2-5 CM |  |  | 1.51 | 0.57, 4.01 |  |  |
| >5 CM |  |  | 0.00 | 0.00, Inf |  |  |
| **Calcification** | 213 | 16 |  |  | **0.024** | 0.44 |
| Non with |  |  | — | — |  |  |
| with |  |  | 0.17 | 0.02, 1.27 |  |  |
| **EER** | 213 | 16 |  |  | 0.87 | 0.98 |
| <60% |  |  | — | — |  |  |
| 60%-100% |  |  | 1.20 | 0.27, 5.35 |  |  |
| >100% |  |  | 1.39 | 0.38, 5.15 |  |  |
| **Enhancement_curve_types** | 213 | 16 |  |  | 0.98 | 0.98 |
| Persistent |  |  | — | — |  |  |
| Plateau |  |  | 0.99 | 0.31, 3.17 |  |  |
| Wash-in Wash-out |  |  | 0.85 | 0.16, 4.63 |  |  |
| 1HR = Hazard Ratio, CI = Confidence Interval | | | | | | |
| 2False discovery rate correction for multiple testing | | | | | | |
| **Abbreviation:**extracellular heat shock protein 90α, eHSP90α;carcinoembryonic antigen, CEA | | | | | | |

**Supplementary Table2 Adjusted univariate COX regression analysis of influencing results of breast cancer with OS as the outcome**

| **Characteristic** | **N** | **Event N** | **HR**1 | **95% CI**1 | **p-value** | **q-value**2 |
| --- | --- | --- | --- | --- | --- | --- |
| **T** | 213 | 16 |  |  | 0.42 | 0.87 |
| T1 |  |  | — | — |  |  |
| T2-T4 |  |  | 1.51 | 0.55, 4.15 |  |  |
| **N** | 213 | 16 |  |  | 0.86 | 0.87 |
| N0 |  |  | — | — |  |  |
| N1-N3 |  |  | 0.91 | 0.32, 2.62 |  |  |
| **Clinical_staging** | 213 | 16 |  |  | 0.31 | 0.87 |
| I |  |  | — | — |  |  |
| II-III |  |  | 1.75 | 0.56, 5.42 |  |  |
| **Pathological_grading** | 213 | 16 |  |  | 0.34 | 0.87 |
| I-II |  |  | — | — |  |  |
| III |  |  | 1.62 | 0.61, 4.31 |  |  |
| **PR** | 213 | 16 |  |  | 0.83 | 0.87 |
| <1% |  |  | — | — |  |  |
| 1-10% |  |  | 1.29 | 0.24, 7.02 |  |  |
| >10% |  |  | 0.81 | 0.25, 2.59 |  |  |
| **Molecular_typing** | 213 | 16 |  |  | 0.31 | 0.87 |
| Luminal A&Luminal B |  |  | — | — |  |  |
| HER2 overexpression&Triple negative |  |  | 1.87 | 0.60, 5.79 |  |  |
| **Vascular_cancer_thrombus** | 213 | 16 |  |  | 0.71 | 0.87 |
| No |  |  | — | — |  |  |
| Yes |  |  | 0.82 | 0.28, 2.36 |  |  |
| **perineural_invasion** | 213 | 16 |  |  | 0.74 | 0.87 |
| No |  |  | — | — |  |  |
| Yes |  |  | 1.21 | 0.39, 3.77 |  |  |
| **Hsp90a** | 213 | 16 |  |  | 0.081 | 0.73 |
| <82 ng/mL |  |  | — | — |  |  |
| >82 ng/mL |  |  | 2.59 | 0.94, 7.15 |  |  |
| **CEA** | 213 | 16 |  |  | 0.18 | 0.87 |
| <5 ng/mL |  |  | — | — |  |  |
| >5 ng/mL |  |  | 2.04 | 0.74, 5.63 |  |  |
| **CA199** | 213 | 16 |  |  | 0.39 | 0.87 |
| <37 U/mL |  |  | — | — |  |  |
| >37 U/mL |  |  | 2.03 | 0.46, 8.94 |  |  |
| **Number_of_tumors** | 213 | 16 |  |  | 0.73 | 0.87 |
| 1 |  |  | — | — |  |  |
| >=2 |  |  | 1.31 | 0.30, 5.77 |  |  |
| **Multiple_lesions** | 213 | 16 |  |  | 0.62 | 0.87 |
| No |  |  | — | — |  |  |
| Yes |  |  | 1.48 | 0.34, 6.50 |  |  |
| **Morphology1** | 213 | 16 |  |  | 0.54 | 0.87 |
| solid |  |  | — | — |  |  |
| cystic solid&non-mass |  |  | 1.44 | 0.47, 4.47 |  |  |
| **Long_Diameter** | 213 | 16 |  |  | 0.44 | 0.87 |
| <2 CM |  |  | — | — |  |  |
| >=2 CM |  |  | 1.47 | 0.55, 3.91 |  |  |
| **Calcification** | 213 | 16 |  |  | **0.024** | 0.44 |
| Non with |  |  | — | — |  |  |
| with |  |  | 0.17 | 0.02, 1.27 |  |  |
| **EER** | 213 | 16 |  |  | 0.87 | 0.87 |
| <60% |  |  | — | — |  |  |
| 60%-100% |  |  | 1.20 | 0.27, 5.35 |  |  |
| >100% |  |  | 1.39 | 0.38, 5.15 |  |  |
| **Enhancement_curve_types** | 213 | 16 |  |  | 0.83 | 0.87 |
| Persistent&Plateau |  |  | — | — |  |  |
| Wash-in Wash-out |  |  | 0.85 | 0.19, 3.75 |  |  |
| 1HR = Hazard Ratio, CI = Confidence Interval | | | | | | |
| 2False discovery rate correction for multiple testing | | | | | | |
| **Abbreviation:**extracellular heat shock protein 90α, eHSP90α; carcinoembryonic antigen, CEA. | | | | | | |

**Supplementary Table 3. DFS Baseline data of patients in the test and validation sets.**

| **Characteristic** | **Test**  N = 641 | **Train**  N = 1491 | **p-value**2 |
| --- | --- | --- | --- |
| **Age** | 35 (55%) | 75 (50%) | 0.6 |
| **Menstrual_status** | 36 (56%) | 78 (52%) | 0.6 |
| **Family_history** | 0 (0%) | 6 (4.0%) | 0.2 |
| **Pathological_type** |  |  | 0.8 |
| 0 | 34 (53%) | 85 (57%) |  |
| 1 | 29 (45%) | 60 (40%) |  |
| 2 | 1 (1.6%) | 4 (2.7%) |  |
| **T** |  |  | 0.4 |
| 1 | 33 (52%) | 67 (45%) |  |
| 2 | 30 (47%) | 81 (54%) |  |
| 4 | 1 (1.6%) | 1 (0.7%) |  |
| **N** |  |  | 0.8 |
| 0 | 41 (64%) | 101 (68%) |  |
| 1 | 19 (30%) | 41 (28%) |  |
| 2 | 4 (6.3%) | 6 (4.0%) |  |
| 3 | 0 (0%) | 1 (0.7%) |  |
| **Clinical_staging** |  |  | 0.6 |
| 1 | 26 (41%) | 51 (34%) |  |
| 2 | 34 (53%) | 89 (60%) |  |
| 3 | 4 (6.3%) | 9 (6.0%) |  |
| **Pathological_grading** |  |  | 0.7 |
| 1 | 0 (0%) | 2 (1.3%) |  |
| 2 | 41 (64%) | 88 (59%) |  |
| 3 | 23 (36%) | 59 (40%) |  |
| **ER** |  |  | 0.045 |
| 0 | 11 (17%) | 29 (19%) |  |
| 1 | 3 (4.7%) | 0 (0%) |  |
| 2 | 50 (78%) | 120 (81%) |  |
| **PR** |  |  | 0.15 |
| 0 | 15 (23%) | 33 (22%) |  |
| 1 | 2 (3.1%) | 17 (11%) |  |
| 2 | 47 (73%) | 99 (66%) |  |
| **HER2** | 17 (27%) | 41 (28%) | 0.9 |
| **Ki_67** | 54 (84%) | 129 (87%) | 0.7 |
| **Molecular_typing** |  |  | >0.9 |
| 1 | 9 (14%) | 20 (13%) |  |
| 2 | 45 (70%) | 106 (71%) |  |
| 3 | 4 (6.3%) | 11 (7.4%) |  |
| 4 | 6 (9.4%) | 12 (8.1%) |  |
| **Vascular_cancer_thrombus** | 22 (34%) | 54 (36%) | 0.8 |
| **perineural_invasion** | 12 (19%) | 34 (23%) | 0.5 |
| **Hsp90a** | 12 (19%) | 29 (19%) | >0.9 |
| **CEA** | 11 (17%) | 39 (26%) | 0.2 |
| **CA125** | 3 (4.7%) | 8 (5.4%) | >0.9 |
| **CA153** | 2 (3.1%) | 6 (4.0%) | >0.9 |
| **CA199** | 1 (1.6%) | 14 (9.4%) | 0.043 |
| **Number_of_tumors** |  |  | 0.5 |
| 1 | 57 (89%) | 136 (91%) |  |
| 2 | 1 (1.6%) | 5 (3.4%) |  |
| 3 | 6 (9.4%) | 8 (5.4%) |  |
| **Multiple_lesions** | 5 (7.8%) | 13 (8.7%) | 0.8 |
| **Multi_center** | 3 (4.7%) | 2 (1.3%) | 0.2 |
| **Main_lesion_quadrant** | 9 (14%) | 16 (11%) | 0.5 |
| **Morphology1** |  |  | 0.8 |
| 1 | 54 (84%) | 118 (79%) |  |
| 2 | 6 (9.4%) | 19 (13%) |  |
| 3 | 4 (6.3%) | 12 (8.1%) |  |
| **Morphology2** |  |  | 0.8 |
| 1 | 60 (94%) | 137 (92%) |  |
| 2 | 4 (6.3%) | 12 (8.1%) |  |
| **Tumor_like** | 60 (94%) | 137 (92%) | 0.8 |
| **Long_Diameter** |  |  | >0.9 |
| 1 | 39 (61%) | 87 (58%) |  |
| 2 | 25 (39%) | 60 (40%) |  |
| 3 | 0 (0%) | 2 (1.3%) |  |
| **Edge** | 63 (98%) | 147 (99%) | >0.9 |
| **Burr** | 56 (88%) | 123 (83%) | 0.4 |
| **Splitting_leaves** | 40 (63%) | 96 (64%) | 0.8 |
| **Calcification** | 19 (30%) | 40 (27%) | 0.7 |
| **EER** |  |  | 0.7 |
| 1 | 16 (25%) | 33 (22%) |  |
| 2 | 14 (22%) | 41 (28%) |  |
| 3 | 34 (53%) | 75 (50%) |  |
| **Enhancement_curve_types** |  |  | >0.9 |
| 1 | 15 (23%) | 36 (24%) |  |
| 2 | 39 (61%) | 92 (62%) |  |
| 3 | 10 (16%) | 21 (14%) |  |
| **Involved_skin** |  |  | 0.2 |
| 0 | 59 (92%) | 137 (92%) |  |
| 1 | 2 (3.1%) | 10 (6.7%) |  |
| 2 | 3 (4.7%) | 2 (1.3%) |  |
| **Infringement_ipple_areola_complex** |  |  | >0.9 |
| 0 | 62 (97%) | 143 (96%) |  |
| 1 | 2 (3.1%) | 5 (3.4%) |  |
| 2 | 0 (0%) | 1 (0.7%) |  |
| **Distance_from_nipple_areola** | 13 (20%) | 27 (18%) | 0.7 |
| **type** | 2 (3.1%) | 14 (9.4%) | 0.2 |
| 1n (%) | | | |
| 2Pearson's Chi-squared test; Fisher's exact test | | | |
